# Supplementary material for: Highly ordered surfactant micelles function as the extraction matrix for direct electrochemical detection of halonitrobenzenes at the ppb level
Source: Royal Society of Chemistry journal article supplement (doi:10.1039/c5an02439k), 2016-01-01
Supplement: c5an02439k1.pdf [file c5an02439k1.pdf]

Supporting information to

# **Highly ordered surfactant micelles function as the extraction matrix for direct electrochemical detection of halonitrobenzenes at the ppb level**

*Lina Yao, Fei Yan and Bin Su\**

Institute of Microanalytical Systems, Department of Chemistry, Zhejiang University,  
Hangzhou 310012, China

\* Corresponding author. E-mail: [subin@zju.edu.cn](mailto:subin@zju.edu.cn); Tel./fax: + 86 - 571 - 88272572

## **Table of Content**

**S1. Molecular structures of studied HNBS**

**S2. TEM and SEM images of the OSM@SM/ITO electrode**

**S3. Electrochemical behaviors of the other three HNBS**

**S4. The effect of the scan rate**

**S5. Optimized conditions for HNBS detection**

S5.1. Electrolyte solution

S5.2. Accumulation time

**S6. Detection of other three HNBS**

### S1. Molecular structures of studied HNBs

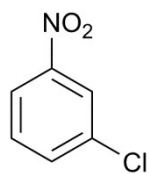

*m*-NCB

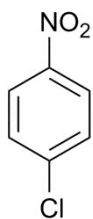

*p*-NCB

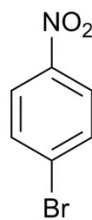

*p*-NBB

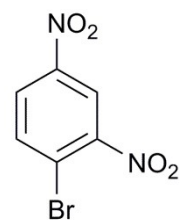

DNBB

**Scheme S1.** Molecular structures of studied HNBs

## S2. TEM and SEM images of the OSM@SM/ITO electrode

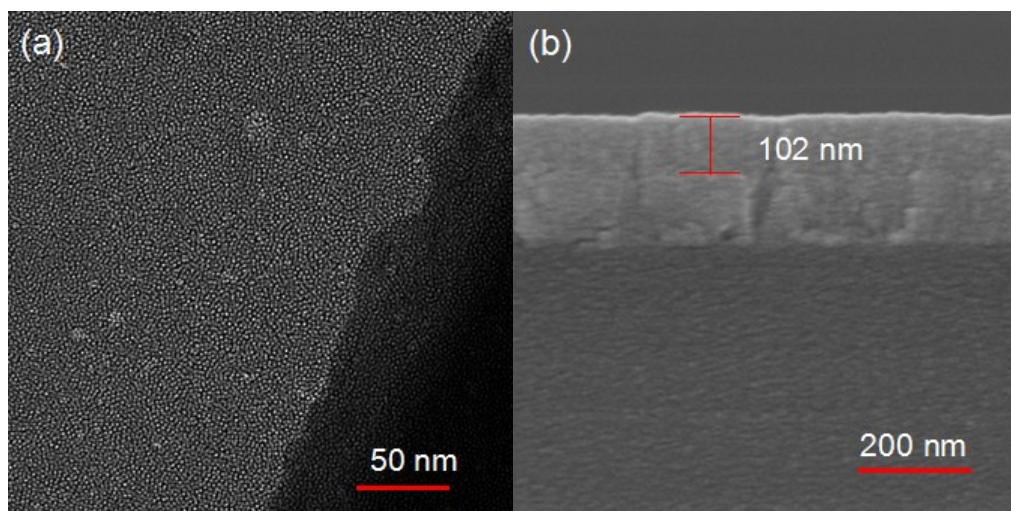

**Fig. S1** (a) TEM image of OSM@SM film showing the mesopores as the bright spots. (b) Cross-sectional SEM image illustrating the OSM@SM layer on the ITO electrode surface with a thickness of ca. 102 nm.

### S3. Electrochemical behaviors of the other three HNBs

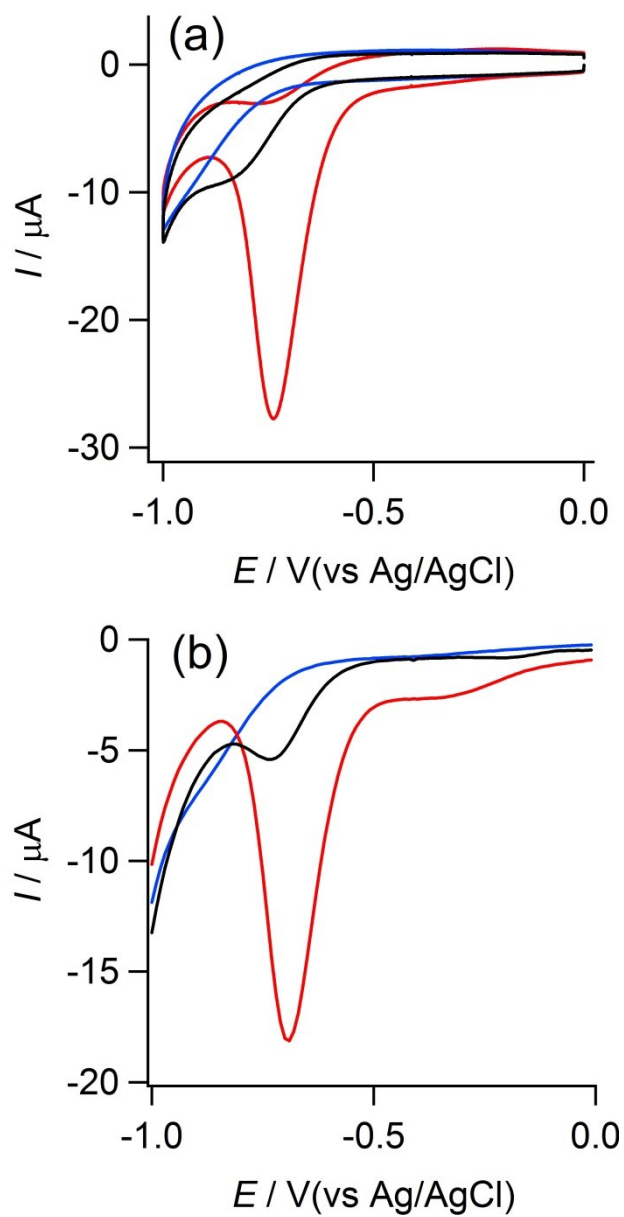

**Fig. S2.** CVs (a) and DPVs (b) of 1 ppm *p*-NCB at the bare ITO (black), SM/ITO (blue) and OSM@SM/ITO (red) electrodes in 0.5 M PBS (pH 7.0). The scan rate was 50 mV s<sup>-1</sup>.

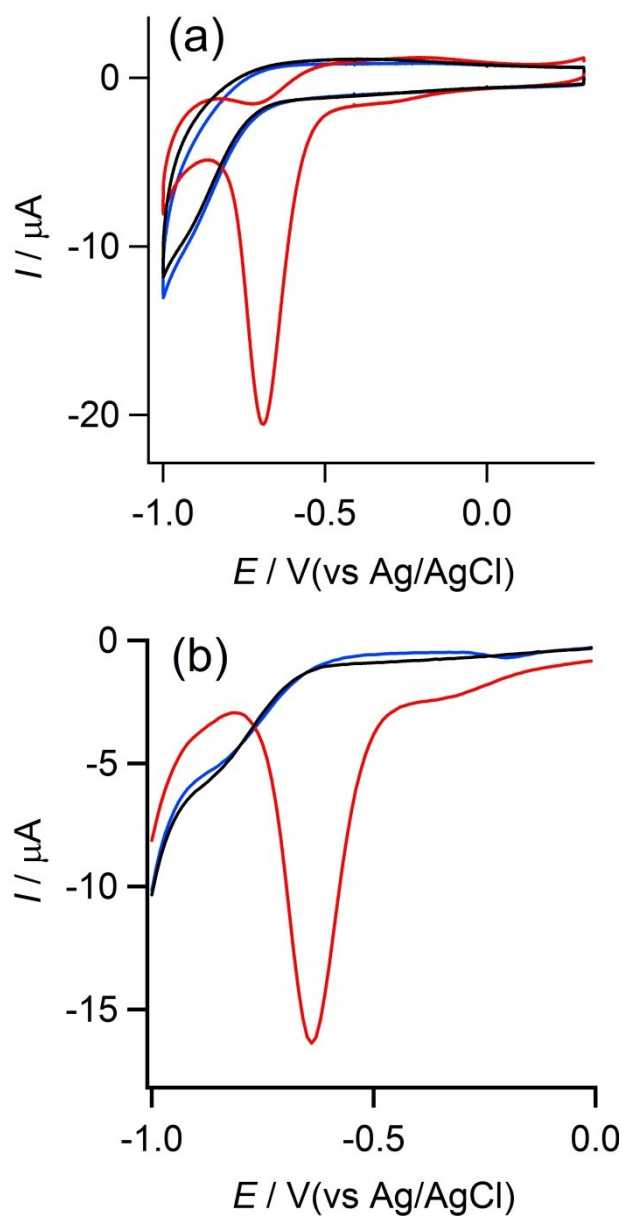

**Fig. S3.** CVs (a) and DPVs (b) of 1 ppm *p*-NBB at the bare ITO (black), SM/ITO (blue) and OSM@SM/ITO (red) electrodes in 0.5 M PBS (pH 7.0). The scan rate was 50 mV s<sup>-1</sup>.

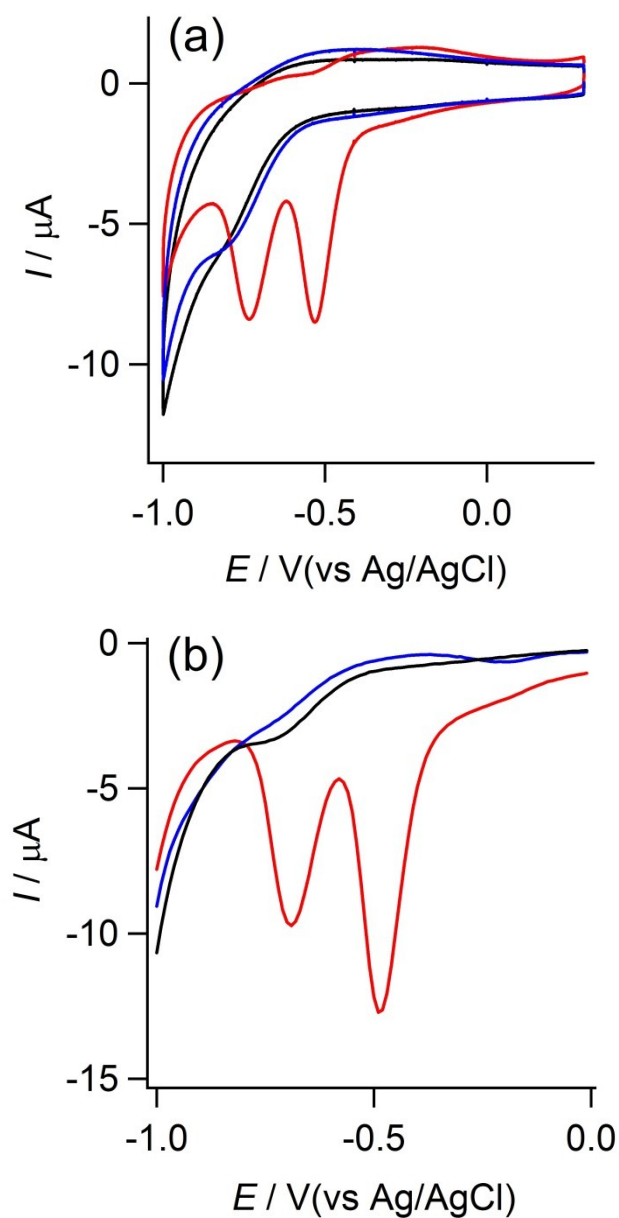

**Fig. S4.** CVs (a) and DPVs (b) of 1 ppm DNBB at the bare ITO (black), SM/ITO (blue) and OSM@SM/ITO (red) electrodes in 0.5 M PBS (pH 7.0). The scan rate was 50 mV s<sup>-1</sup>.

#### S4. The effect of the scan rate

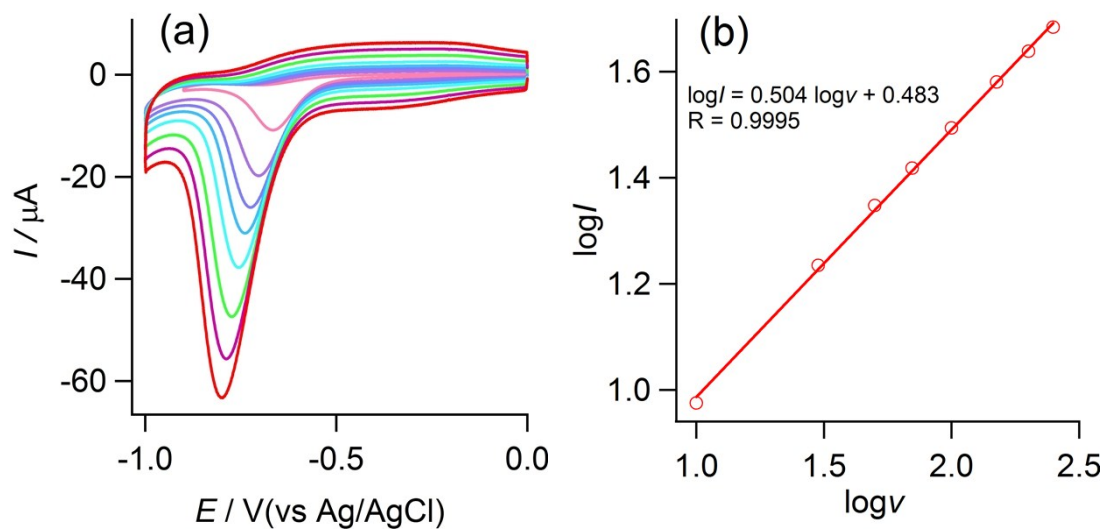

**Fig. S5.** (a) CVs of 1 ppm *m*-NCB at OSM@SM/ITO electrodes in 0.5 M PBS (pH 7.0) solution at different scan rates (from inner to outer: 10, 30, 50, 70, 100, 150, 200, 250  $\text{mV s}^{-1}$ ); (b) A double logarithmic curve of the reduction peak current and scan rate.

## S5. Optimized conditions for HNBS detection

### S5.1. Electrolyte solution

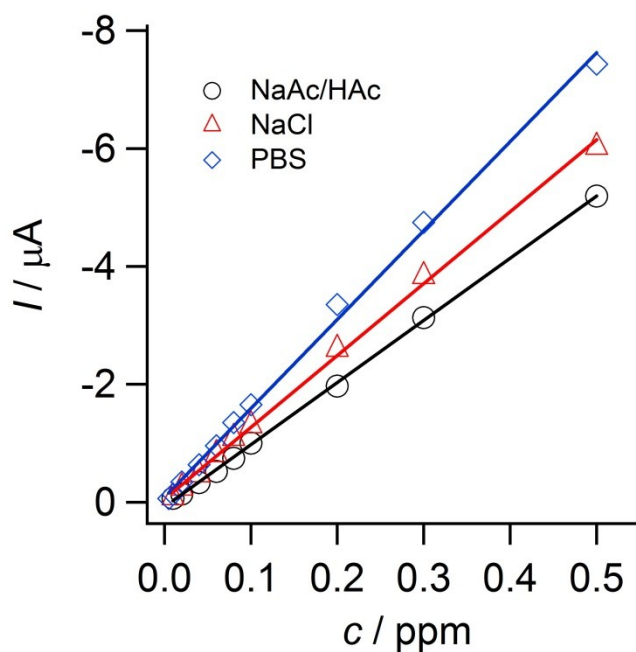

**Fig. S6.** Calibration curves for  $m$ -NCB detection at the OSM@SM/ITO electrode by DPV in different aqueous supporting electrolytes: 0.5 M NaCl, 0.5 M PBS (pH 7.0) and 0.5 M HAc/NaAc (pH 7.0). Before measurement, the preconcentration of  $m$ -NCB was performed by immersing the electrode in solutions under stirring for 1 min.

**Table S1.** Effect of the electrolyte solution on the detection of  $m$ -NCB.

| Electrolyte solution<br>(0.5 M) | Lowest Detected<br>Concentration (ppb) | Sensitivity<br>( $\mu\text{A}/\text{ppm}$ ) | $R$    |
|---------------------------------|----------------------------------------|---------------------------------------------|--------|
| NaCl                            | 10                                     | 10.55                                       | 0.9997 |
| NaAc/HAc (pH=7)                 | 5                                      | 12.19                                       | 0.9990 |
| PBS (pH=7)                      | 10                                     | 15.08                                       | 0.9985 |



### S5.2. Accumulation time

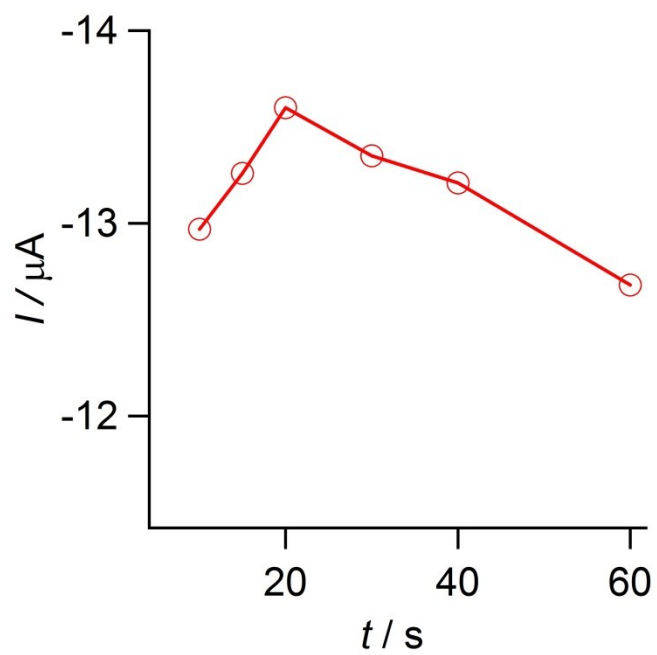

**Fig. S7.** Time-dependent plots at the OSM@SM/ITO electrode for 1 ppm *m*-NCB accumulated by stirring at 300 rpm.

## S6. Detection of other three HNBs

When two or more reduction peak is observed, the signal of the most prominent reduction peak was selected for the quantitative analysis.

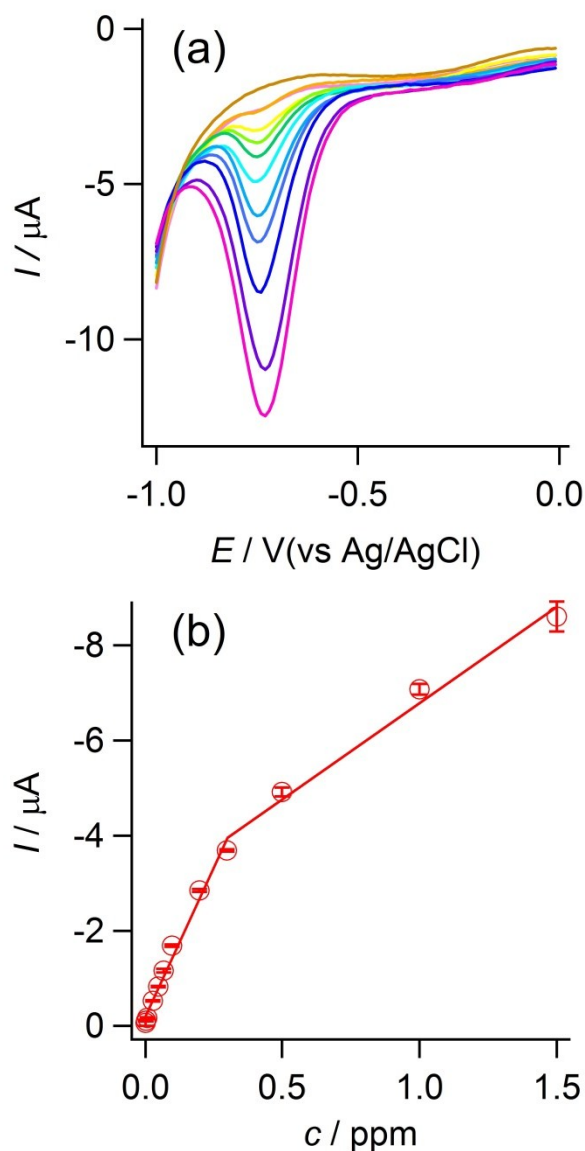

**Fig. S8.** (a) DPVs for various concentrations of *p*-NCB at the OSM@SM/ITO electrode in 0.5 M PBS (pH 7.0) solution. (b) The calibration curve of *p*-NCB. Error bars represent the standard deviations of three measurements.

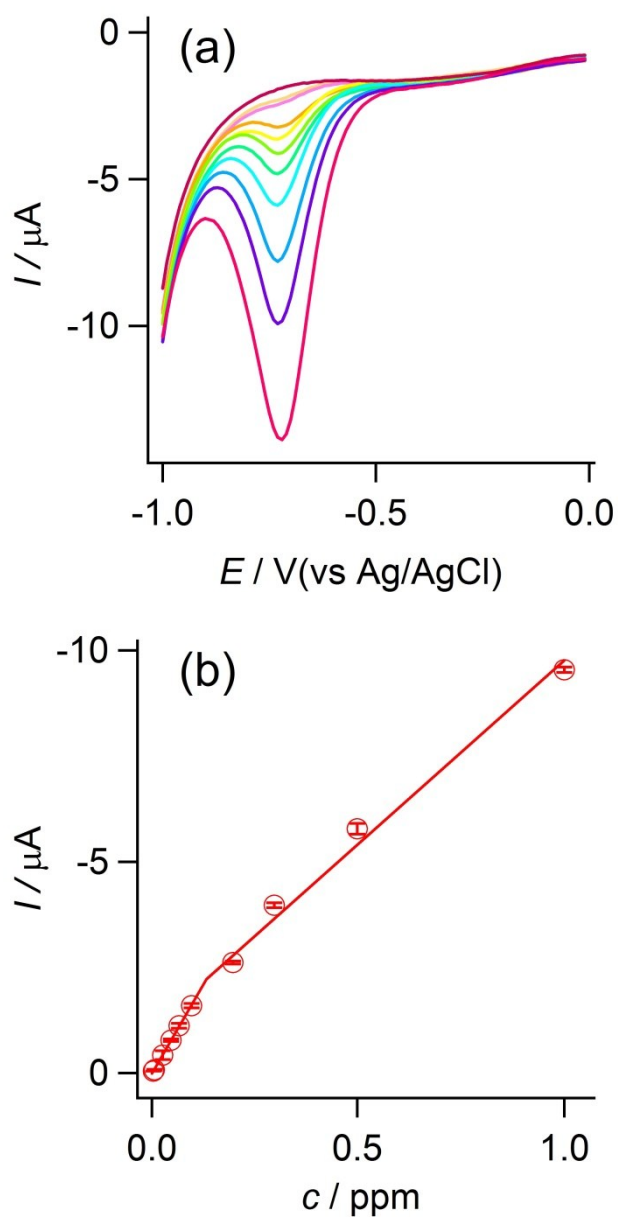

**Fig. S9.** (a) DPVs for various concentrations of *p*-NBB at the OSM@SM/ITO electrode in 0.5 M PBS (pH 7.0) solution. (b) The calibration curve of *p*-NBB. Error bars represent the standard deviations of three measurements.

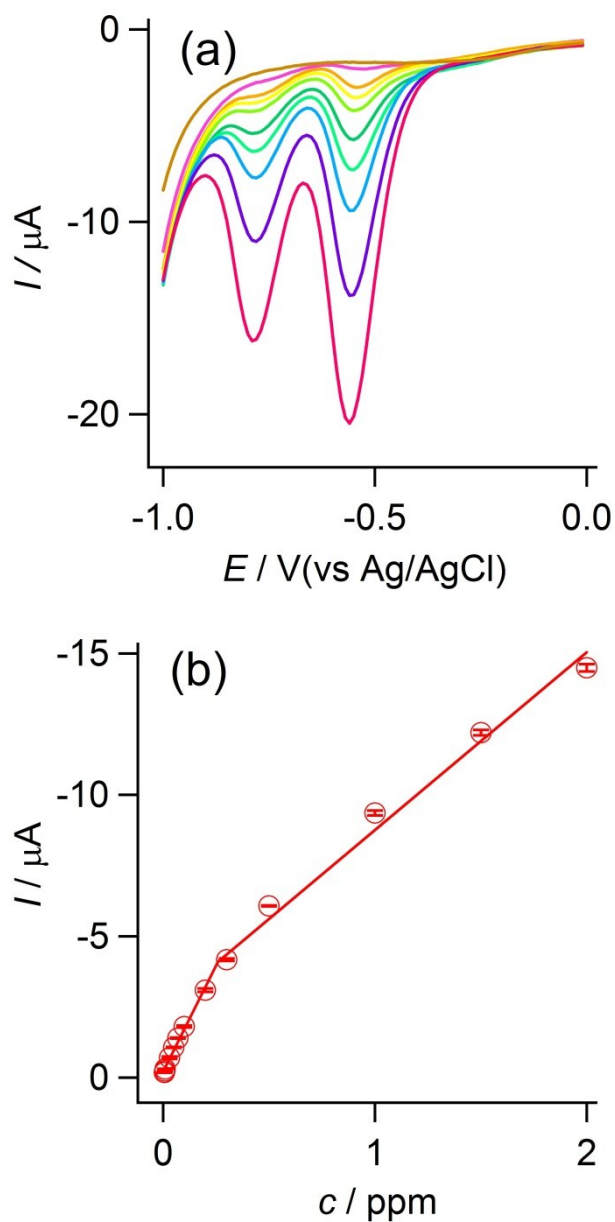

**Fig. S10.** (a) DPVs for various concentrations of DNBB at the OSM@SM/ITO electrode in 0.5 M PBS (pH 7.0) solution. (b) The calibration curve of DNBB. Error bars represent the standard deviations of three measurements.
